# Supplementary material for: Targeting Autophagy Augments Berberine-Mediated Cell Death in Human Hepatoma Cells Harboring Hepatitis C Virus RNA
Source: PubMed Central journal article supplement (PMC7226840; doi:10.3390/cells9040908), 2020-04-08
Supplement: cells-09-00908-s001.pdf [file cells-09-00908-s001.pdf]

# Targeting Autophagy Augments BBR-Mediated Cell Death in Human Hepatoma Cells Harboring Hepatitis C Virus RNA

## Supplementary Materials

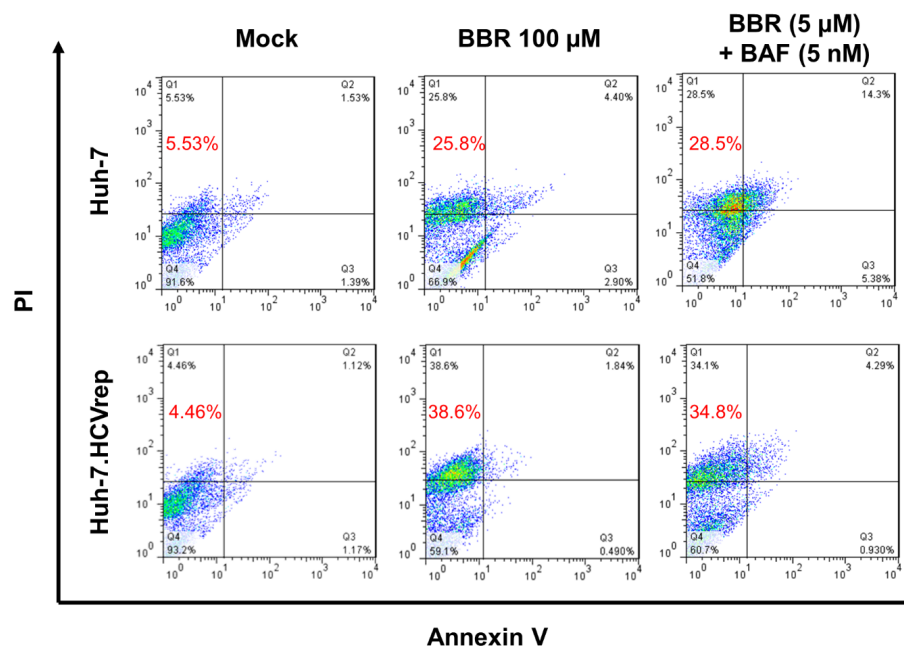

**Figure S1.** Co-treatment of non-cytotoxic concentrations of BBR and BAF induced hepatoma cell death similar to 100 μM of BBR alone. Cells were seeded in 6-well plates and co-treated with non-cytotoxic concentrations of BBR (5 μM) and BAF (5 nM) for 48 h. Cells were then trypsinized, stained with Annexin V and propidium iodide (PI), and analyzed by flow cytometry as indicated in the manuscript.

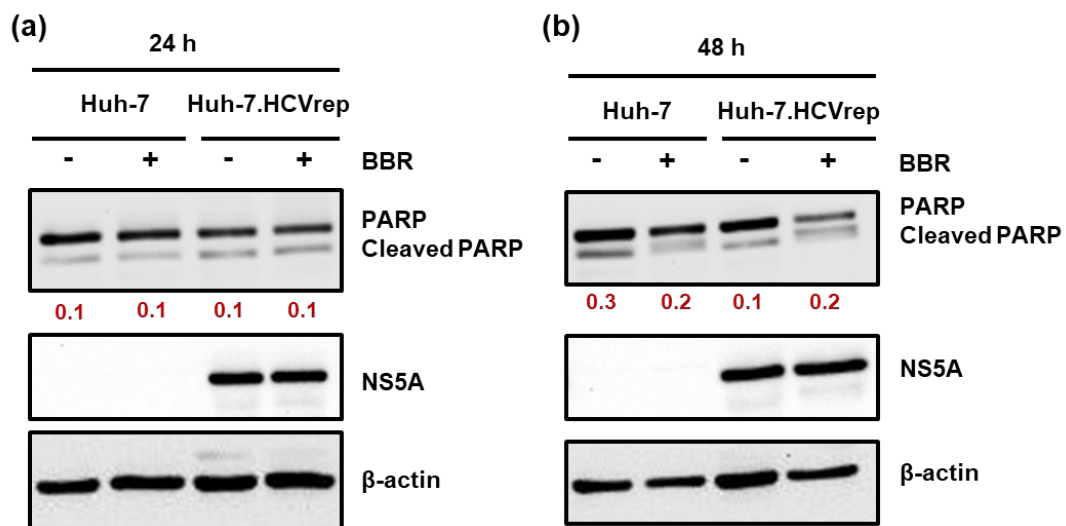

**Figure S2. BBR treatment did not trigger PARP cleavage.** The Huh-7 cells and the Huh-7.HCVrep cells were seeded in 6-well plates and treated with or without 100  $\mu$ M BBR for (a) 24 h and (b) 48 h. The lysates were subsequently collected for a Western blot analysis against the indicated proteins.

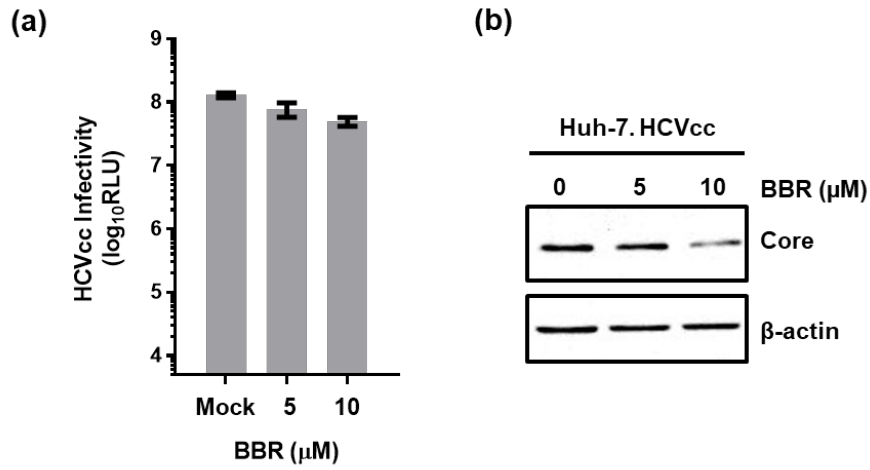

**Figure S3. BBR treatment marginally blocked HCV replication.** (a) The Huh-7.HCVcc cells were seeded in a 96-well plate and treated with the indicated non-cytotoxic concentrations of BBR for 72 h. The supernatants were then collected and assayed for the *Gaussia* luciferase activity. (b) Huh-7.HCVcc cells were seeded in 6-well plates and treated with or without BBR for 72 h. The lysates were subsequently collected for a Western blot analysis against the indicated proteins.
